# Supplementary material for: Hydrogen Sulfide-Releasing Fibrous Membranes: Potential Patches for Stimulating Human Stem Cells Proliferation and Viability under Oxidative Stress
Source: MDPI journal article supplement (doi:10.3390/ijms19082368), 2018-08-11
Supplement: s1 [file s1]

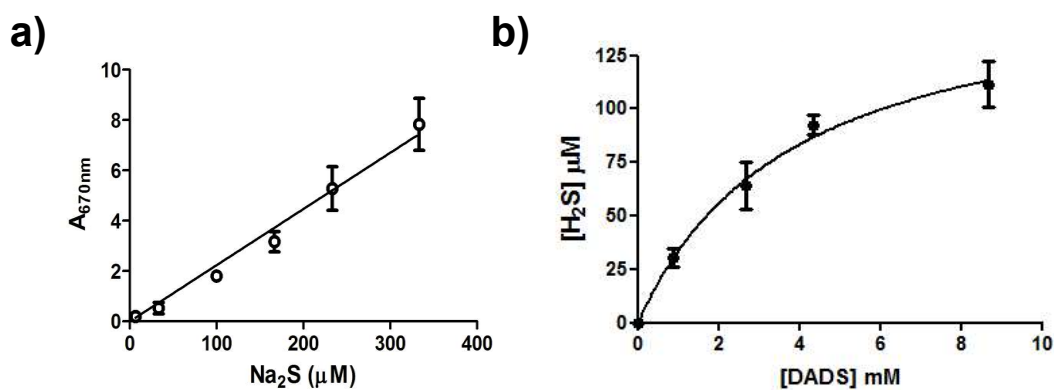

### Figure S1

**Figure S1.** H<sub>2</sub>S slow-releasing from Na<sub>2</sub>S and DADS. **a)** Calibration curve of H<sub>2</sub>S formation by methylene blue assay, obtained at different concentration of Na<sub>2</sub>S by absorbance 670 nm. **b)** H<sub>2</sub>S-release at different concentrations of DADS in DMSO, in the presence of 1 mM DTT in 50 mM Tris-HCl, pH 7.4 buffer. The H<sub>2</sub>S concentrations were calculated using a calibration curve obtained at different concentrations of Na<sub>2</sub>S. Each bar represents the ±SD of three experiments as biological replicas.

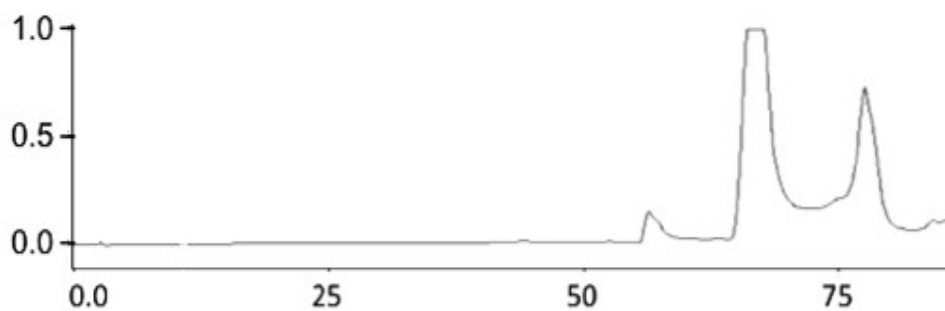

### Figure S2

**Figure S2.** RP-HPLC of DADS. RP-HPLC chromatogram of DADS obtained using C<sub>18</sub> column at 0.8 ml/min flow rate. The elution was performed with a linear gradient of solv. B (80%CH<sub>3</sub>CN, 0.1% TFA).

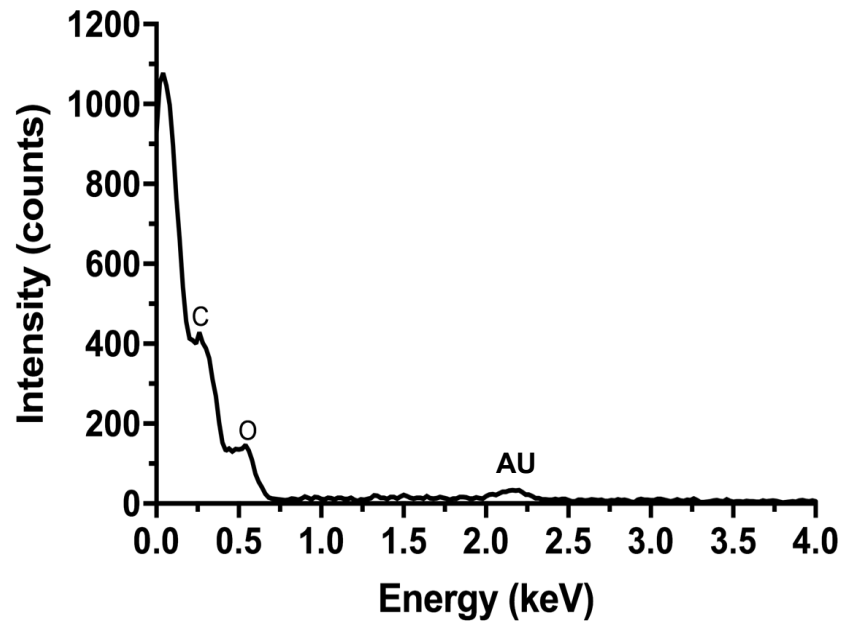

### Figure S3

Figure S3. EDS of neat PFM

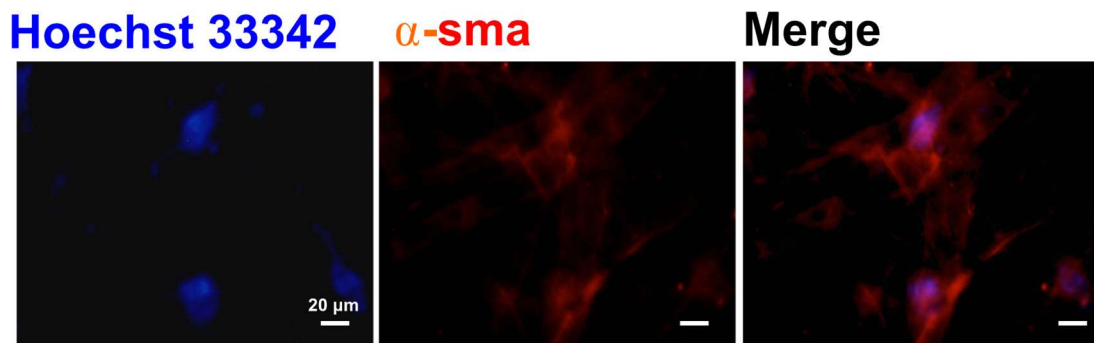

### Figure S4

Figure S4. Fluorescence confocal micrographs of cMSC cultured on PFM for 3 days. The nuclei are stained with Hoechst 33342 (in blue) and the expressions of  $\alpha$ -sma (in red) are detected. Scale bars= 20  $\mu$ m.
